# Supplementary material for: Age-period-cohort analysis of stroke incidence in China and India from 1990 to 2019 and predictions up to 2042
Source: Research Square preprint supplement (doi:10.21203/rs.3.rs-2648089/v1), 2023-03-15
Supplement: Supplementary file 1 [file ed27da8a9fb43c630e390764.docx]

Supplementary Table 1 APC modeling results of stroke incidence in China and India.

| Factor | China Incidence (Coef) | | India Incidence (Coef) | |
| --- | --- | --- | --- | --- |
| Man | Women | Man | Women |
| Age |  |  |  |  |
| 0~4 | -1.56 | -1.03 | -0.82 | -0.75 |
| 5~9 | -1.74 | -1.30 | -1.15 | -1.02 |
| 10~14 | -1.87 | -1.55 | -1.48 | -1.32 |
| 15~19 | -1.92 | -1.74 | -1.72 | -1.58 |
| 20~24 | -1.75 | -1.71 | -1.67 | -1.57 |
| 25~29 | -1.49 | -1.54 | -1.42 | -1.35 |
| 30~34 | -1.11 | -1.34 | -1.00 | -1.00 |
| 35~39 | -0.78 | -1.16 | -0.60 | -0.65 |
| 40~44 | -0.30 | -0.68 | -0.15 | -0.24 |
| 45~49 | 0.11 | -0.24 | 0.24 | 0.13 |
| 50~54 | 0.48 | 0.22 | 0.58 | 0.45 |
| 55~59 | 0.78 | 0.62 | 0.86 | 0.71 |
| 60~64 | 1.05 | 1.01 | 1.01 | 0.89 |
| 65~69 | 1.27 | 1.37 | 1.08 | 1.01 |
| 70~74 | 1.51 | 1.63 | 1.09 | 1.07 |
| 75~79 | 1.71 | 1.81 | 1.07 | 1.08 |
| 80~84 | 1.83 | 1.89 | 1.19 | 1.22 |
| 85~89 | 1.90 | 1.89 | 1.37 | 1.40 |
| 90~94 | 1.89 | 1.84 | 1.49 | 1.51 |
| Period |  |  |  |  |
| 1990~1994 | -0.35 | -0.28 | -0.19 | -0.15 |
| 1995~1999 | -0.12 | -0.07 | -0.13 | -0.11 |
| 2000~2004 | 0.09 | 0.08 | -0.05 | -0.08 |
| 2005~2009 | 0.04 | 0.04 | 0.01 | -0.01 |
| 2010~2014 | 0.15 | 0.10 | 0.11 | 0.09 |
| 2015~2019 | 0.19 | 0.12 | 0.26 | 0.26 |
| Cohort |  |  |  |  |
| 1900~1904 | 1.64 | 1.59 | 1.12 | 1.07 |
| 1905~1909 | 1.47 | 1.37 | 1.05 | 1.00 |
| 1910~1914 | 1.30 | 1.16 | 0.97 | 0.91 |
| 1915~1919 | 1.05 | 0.87 | 0.86 | 0.80 |
| 1920~1924 | 0.84 | 0.67 | 0.74 | 0.69 |
| 1925~1929 | 0.66 | 0.53 | 0.63 | 0.58 |
| 1930~1934 | 0.55 | 0.47 | 0.51 | 0.48 |
| 1935~1939 | 0.46 | 0.43 | 0.38 | 0.37 |
| 1940~1944 | 0.37 | 0.39 | 0.25 | 0.26 |
| 1945~1949 | 0.26 | 0.35 | 0.13 | 0.14 |
| 1950~1954 | 0.17 | 0.31 | 0.04 | 0.05 |
| 1955~1959 | 0.06 | 0.21 | -0.04 | -0.02 |
| 1960~1964 | -0.07 | 0.07 | -0.10 | -0.08 |
| 1965~1969 | -0.21 | -0.11 | -0.18 | -0.15 |
| 1970~1974 | -0.35 | -0.31 | -0.25 | -0.23 |
| 1975~1979 | -0.47 | -0.49 | -0.33 | -0.34 |
| 1980~1984 | -0.58 | -0.64 | -0.41 | -0.44 |
| 1985~1989 | -0.69 | -0.74 | -0.51 | -0.54 |
| 1990~1994 | -0.79 | -0.82 | -0.60 | -0.61 |
| 1995~1999 | -0.94 | -0.95 | -0.68 | -0.65 |
| 2000~2004 | -1.06 | -1.02 | -0.75 | -0.70 |
| 2005~2009 | -1.12 | -1.06 | -0.83 | -0.77 |
| 2010~2014 | -1.22 | -1.09 | -0.93 | -0.85 |
| 2015~2019 | -1.32 | -1.16 | -1.06 | -0.98 |
| Deviance | 5.18 | 5.69 | 0.07 | 0.08 |
| AIC | 10.81 | 11.06 | 7.34 | 7.38 |
| BIC | 30.36 | 64.93 | -317.44 | -316.38 |
|  |  |  |  |  |

Supplementary Table 2 Time Trends and Projected Rates of Stroke Incidence in China and India, 2020 to 2042(1/100,000)

| Year | China | | India | |
| --- | --- | --- | --- | --- |
| Man | Women | Man | Women |
| 1990 | 228.18 | 216.63 | 121.38 | 121.65 |
| 1991 | 231.25 | 218.04 | 121.06 | 121.21 |
| 1992 | 233.99 | 219.25 | 120.60 | 120.61 |
| 1993 | 236.38 | 220.26 | 120.02 | 119.88 |
| 1994 | 238.40 | 221.03 | 119.35 | 119.03 |
| 1995 | 240.03 | 221.59 | 118.59 | 118.10 |
| 1996 | 241.17 | 221.93 | 117.39 | 116.70 |
| 1997 | 241.86 | 222.05 | 115.60 | 114.66 |
| 1998 | 242.20 | 221.92 | 113.62 | 112.41 |
| 1999 | 242.33 | 221.43 | 111.90 | 110.36 |
| 2000 | 242.34 | 220.56 | 110.84 | 108.90 |
| 2001 | 242.21 | 219.04 | 110.40 | 107.60 |
| 2002 | 241.83 | 216.90 | 110.24 | 105.93 |
| 2003 | 241.19 | 214.46 | 110.19 | 104.20 |
| 2004 | 240.27 | 212.00 | 110.12 | 102.73 |
| 2005 | 239.06 | 209.84 | 109.88 | 101.84 |
| 2006 | 235.16 | 207.35 | 109.25 | 101.43 |
| 2007 | 227.80 | 204.16 | 108.22 | 101.16 |
| 2008 | 219.37 | 200.93 | 107.07 | 101.02 |
| 2009 | 212.31 | 198.28 | 106.10 | 100.99 |
| 2010 | 208.99 | 196.84 | 105.58 | 101.07 |
| 2011 | 209.11 | 196.52 | 105.55 | 101.22 |
| 2012 | 210.38 | 196.63 | 105.77 | 101.48 |
| 2013 | 212.06 | 196.86 | 106.10 | 101.87 |
| 2014 | 213.43 | 196.87 | 106.48 | 102.47 |
| 2015 | 213.75 | 196.32 | 106.80 | 103.33 |
| 2016 | 210.19 | 193.66 | 107.08 | 106.33 |
| 2017 | 207.42 | 191.89 | 107.49 | 109.48 |
| 2018 | 210.25 | 192.43 | 108.85 | 110.77 |
| 2019 | 209.53 | 192.24 | 109.69 | 113.66 |
| 2020 | 208.80 | 191.97 | 110.56 | 116.64 |
| 2021 | 208.05 | 191.58 | 111.44 | 119.71 |
| 2022 | 207.27 | 191.07 | 112.34 | 122.85 |
| 2023 | 206.46 | 190.46 | 113.28 | 126.07 |
| 2024 | 205.64 | 189.74 | 114.24 | 129.39 |
| 2025 | 204.79 | 188.93 | 115.22 | 132.82 |
| 2026 | 203.92 | 187.99 | 116.21 | 136.35 |
| 2027 | 203.02 | 186.94 | 117.21 | 139.97 |
| 2028 | 202.09 | 185.78 | 118.24 | 143.67 |
| 2029 | 201.14 | 184.52 | 119.29 | 147.49 |
| 2030 | 200.17 | 183.17 | 120.36 | 151.44 |
| 2031 | 199.18 | 181.73 | 121.42 | 155.51 |
| 2032 | 198.16 | 180.19 | 122.49 | 159.68 |
| 2033 | 197.11 | 178.56 | 123.58 | 163.96 |
| 2034 | 196.04 | 176.87 | 124.70 | 168.38 |
| 2035 | 194.97 | 175.13 | 125.83 | 172.95 |
| 2036 | 193.86 | 173.34 | 126.95 | 177.67 |
| 2037 | 192.73 | 171.49 | 128.06 | 182.51 |
| 2038 | 191.58 | 169.60 | 129.20 | 187.49 |
| 2039 | 190.42 | 167.69 | 130.37 | 192.64 |
| 2040 | 189.26 | 165.79 | 131.53 | 197.97 |
| 2041 | 188.07 | 163.88 | 132.69 | 203.48 |
| 2042 | 186.87 | 161.97 | 133.85 | 209.16 |
